# Supplementary material for: Screening of Oligomeric (Meth)acrylate Vaccine Adjuvants Synthesized via Catalytic Chain Transfer Polymerization
Source: MDPI journal article supplement (doi:10.3390/polym15183831), 2023-09-20
Supplement: s1 [file s1]

## SUPPLEMENTARY MATERIALS

### Supplementary Figures

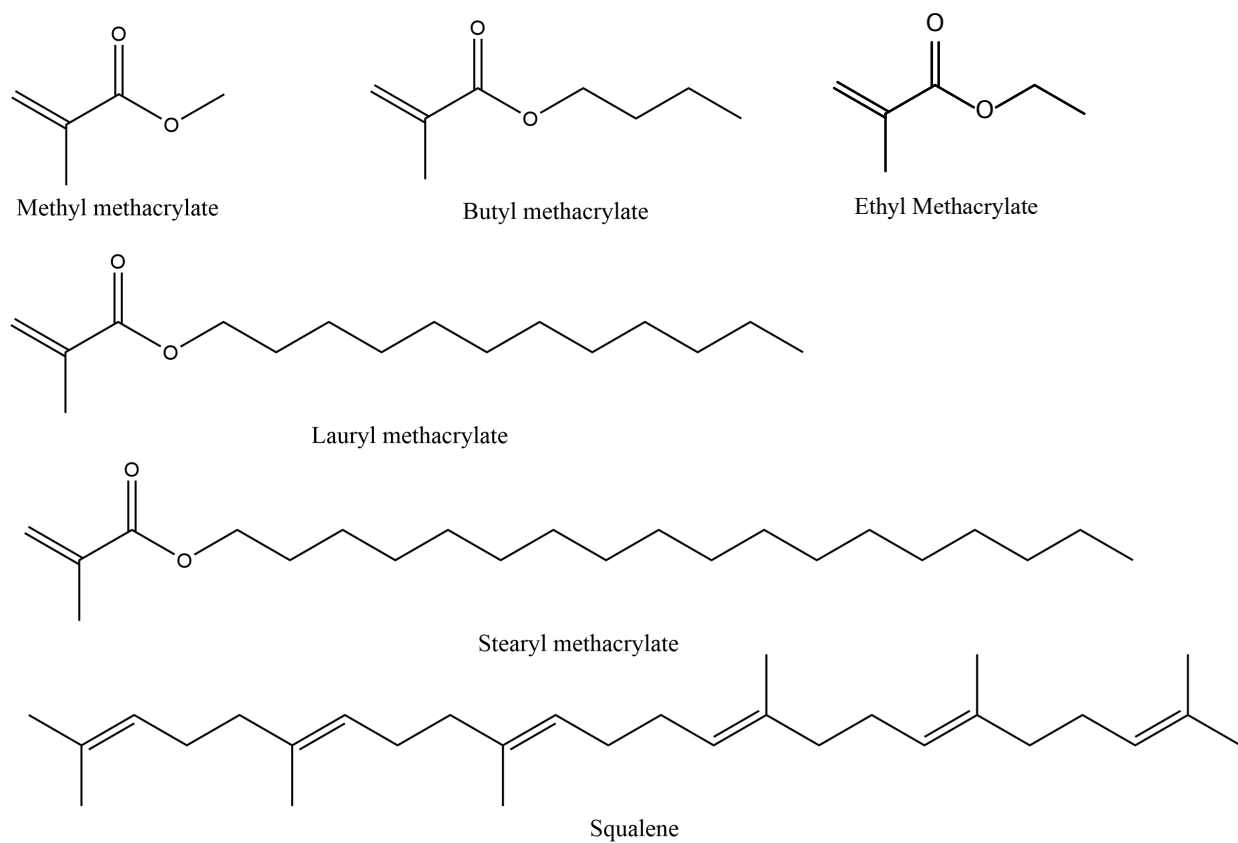

**Figure S1. Molecular structures of the monomers used in this study: methyl methacrylate (MMA), butyl methacrylate (BMA), ethyl methacrylate (EMA), lauryl methacrylate (LMA), and stearyl methacrylate (SMA). The figure also shows the molecular structure of squalene.**

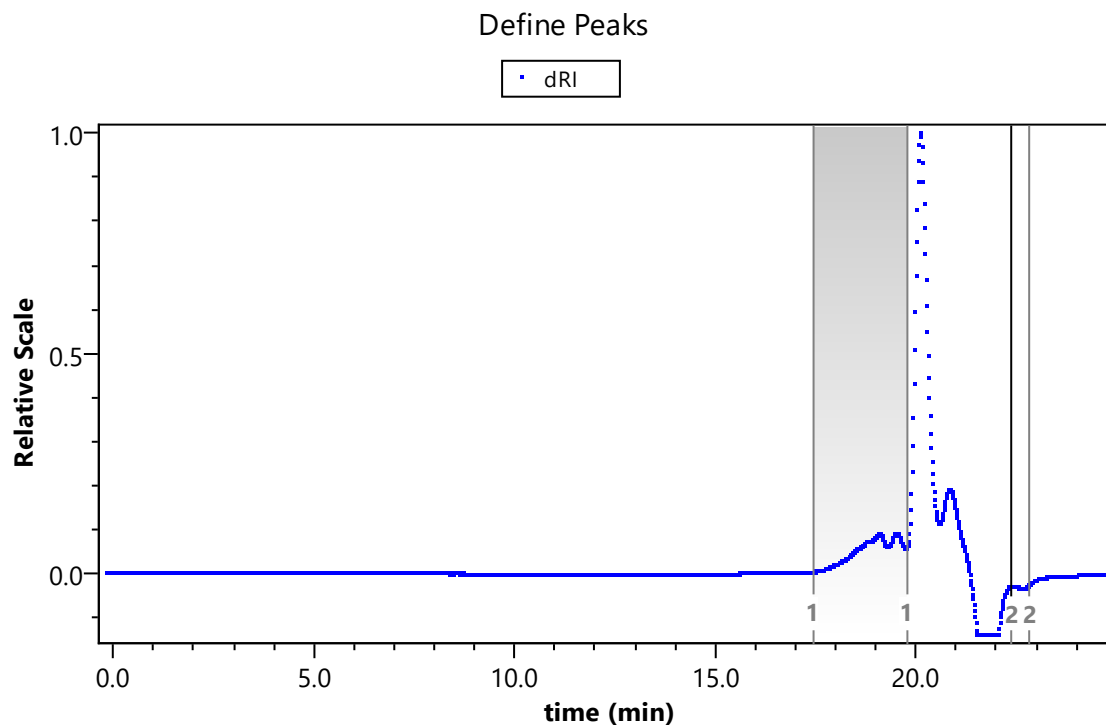

**Figure S2. Representative GPC trace for oligomers produced by the cobalt-catalyzed reactions of MMA polymerization.** The polymer was generated with  $\text{CoBr}_2$  as catalyst using DPG ligand and catalyst loading at 600 PPM with 1 wt% AIBN (see Table 1, Entry 4):  $M_w = 0.43 \text{ kg mol}^{-1}$ ,  $M_n = 0.34 \text{ kg mol}^{-1}$ , and  $\bar{D} = 1.3$ .

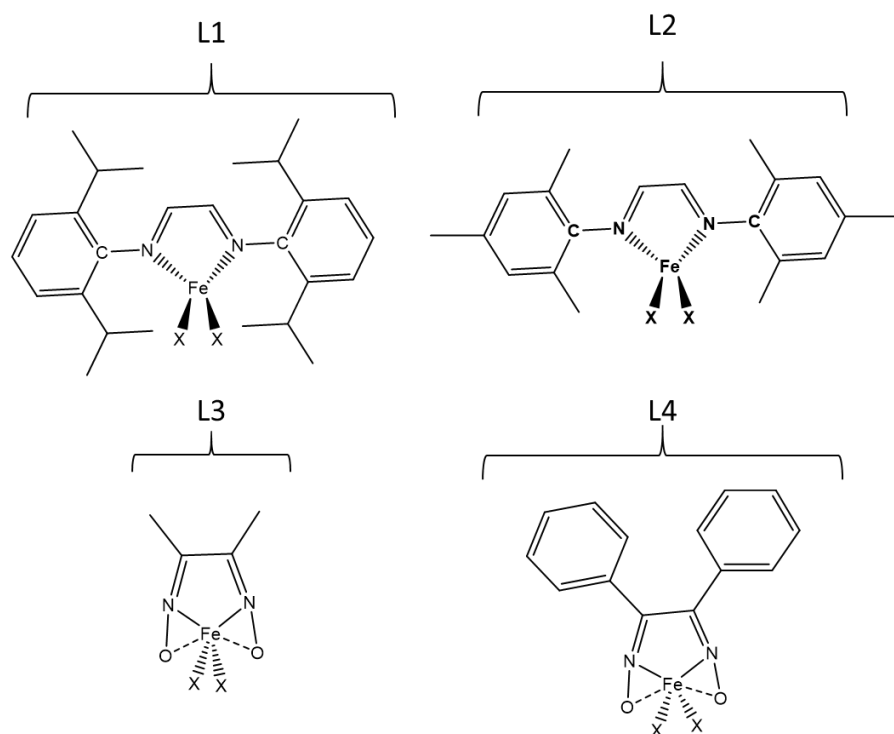

**Figure S3.** Proposed structures of the catalysts, including the ligands L1 = *N,N*-bis(2,6-diisopropylphenyl)ethane-1,2-diimine (DIPP), L2 = *N,N*-bis(2,4,6-trimethylphenyl)ethane-1,2-diimine (TMP), L3 = dimethyl glyoxime (DMG), or L4 = diphenyl glyoxime (DPG), used in iron-catalyzed CCTP.

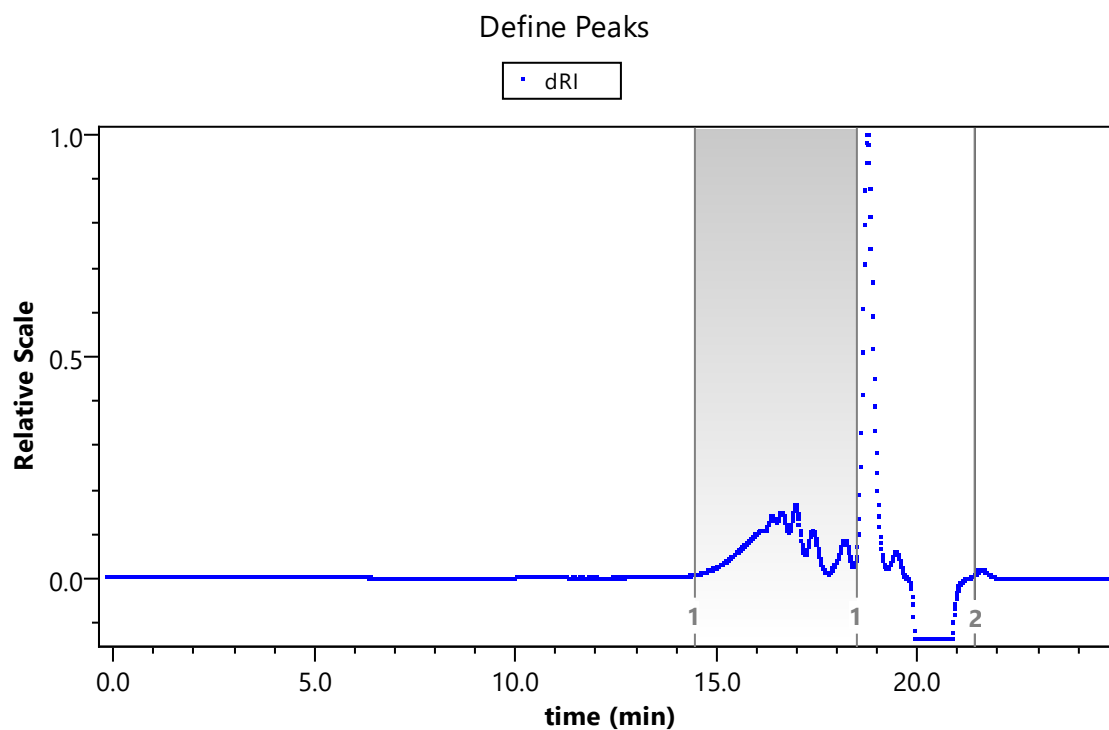

**Figure S4. Representative GPC trace for oligomers produced by the cobalt-catalyzed reactions of BMA polymerization.** The polymer was generated with  $\text{CoBr}_2$  as catalyst using DPG ligand and catalyst loading at 2500 PPM with 1 wt% AIBN (see Table 6, Entry 5):  $M_w = 0.62 \text{ kg mol}^{-1}$ ,  $M_n = 0.48 \text{ kg mol}^{-1}$ , and  $\bar{D} = 1.3$ .

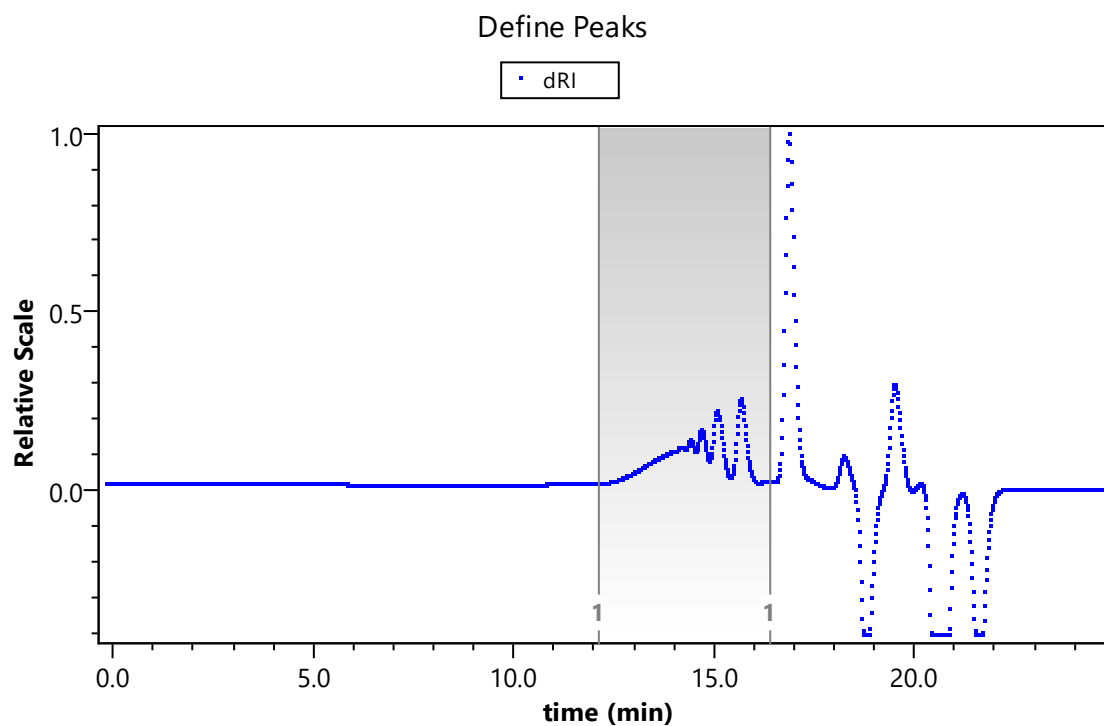

**Figure S5. Representative GPC trace for oligomers produced by the cobalt-catalyzed reactions of LMA polymerization.** The polymer was generated with  $\text{CoBr}_2$  as catalyst using DPG ligand and catalyst loading at 6000 PPM with 1 wt% AIBN (see Table 6, Entry 6):  $M_w = 2.48 \text{ kg mol}^{-1}$ ,  $M_n = 1.71 \text{ kg mol}^{-1}$ , and  $\bar{D} = 1.4$ .

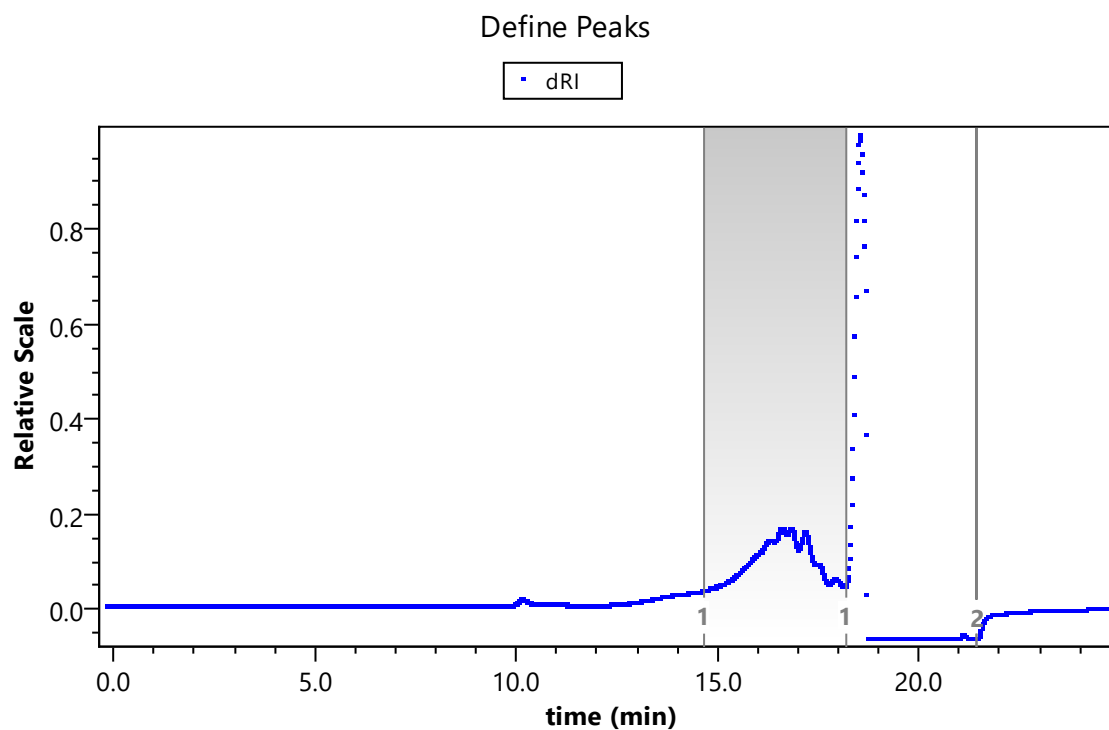

**Figure S6. Representative GPC trace for oligomers produced by the cobalt-catalyzed reactions of BMA/MMA (50/50) copolymerization.** The polymer was generated with  $\text{CoBr}_2$  as catalyst using DPG ligand and catalyst loading at 2500 PPM with 1 wt% AIBN (see Table 6, Entry 7):  $M_w = 0.50 \text{ kg mol}^{-1}$ ,  $M_n = 0.30 \text{ kg mol}^{-1}$ , and  $\bar{D} = 1.9$ .

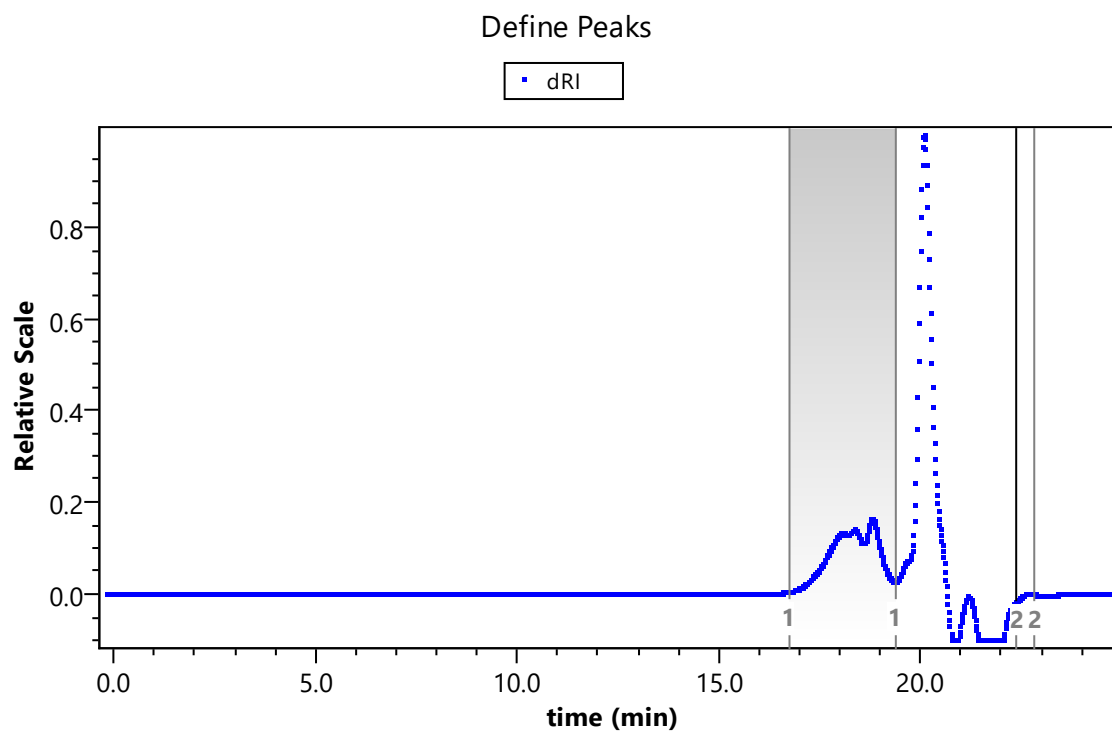

**Figure S7. Representative GPC trace for oligomers produced by the cobalt-catalyzed reactions of LMA/BMA (50/50) copolymerization.** The polymer was generated with  $\text{CoBr}_2$  as catalyst using DPG ligand and catalyst loading at 2500 PPM with 0.7 wt% AIBN (see Table 6, Entry 8):  $M_w = 1.35 \text{ kg mol}^{-1}$ ,  $M_n = 0.6 \text{ kg mol}^{-1}$ , and  $\bar{D} = 2.2$ .

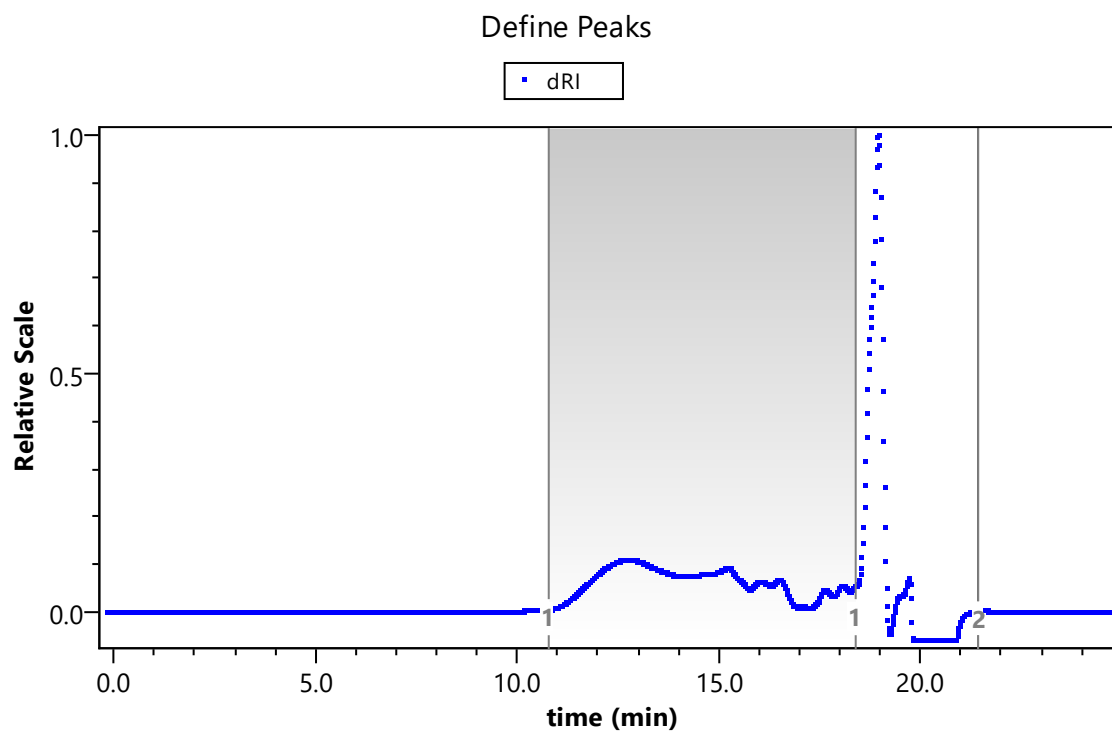

**Figure S8. Representative GPC trace for oligomers produced by the cobalt-catalyzed reactions of BMA/SMA (50/50) copolymerization.** The polymer was generated with  $\text{CoBr}_2$  as catalyst using DPG ligand and catalyst loading at 2500 PPM with 0.7 wt% AIBN (see Table 6, Entry 9):  $M_w = 4.91 \text{ kg mol}^{-1}$ ,  $M_n = 1.9 \text{ kg mol}^{-1}$ , and  $\bar{D} = 2.6$ .

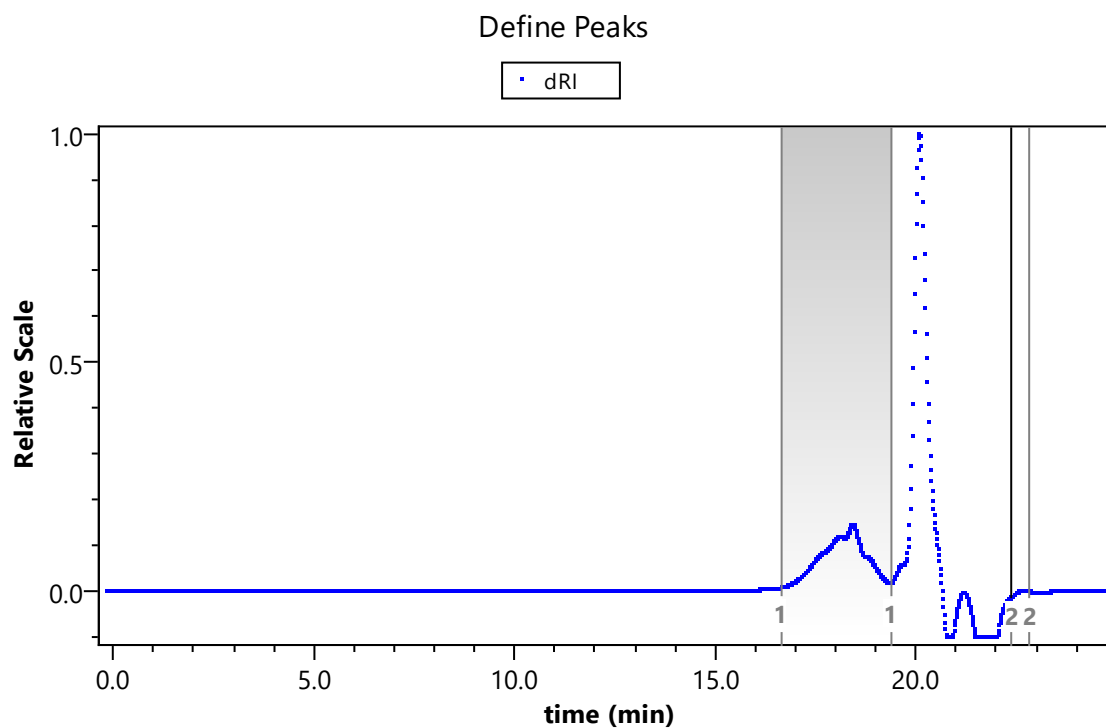

**Figure S9. Representative GPC trace for oligomers produced by the cobalt-catalyzed reactions of SMA/LMA (50/50) copolymerization.** The polymer was generated with  $\text{CoBr}_2$  as catalyst using DPG ligand and catalyst loading at 2500 PPM with 0.7 wt% AIBN (see Table 6, Entry 10):  $M_w = 0.97 \text{ kg mol}^{-1}$ ,  $M_n = 0.70 \text{ kg mol}^{-1}$ , and  $\text{Đ} = 1.4$ .

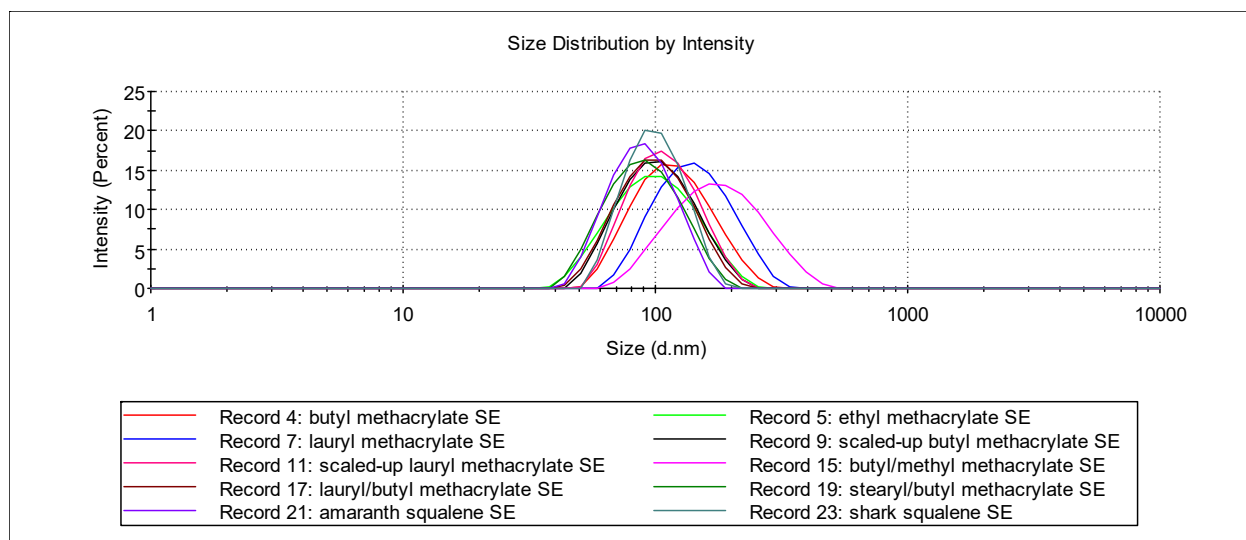

**Figure S10. Representative dynamic light scattering intensity-based size distributions of emulsions.** Measurements were conducted immediately following emulsion manufacture.

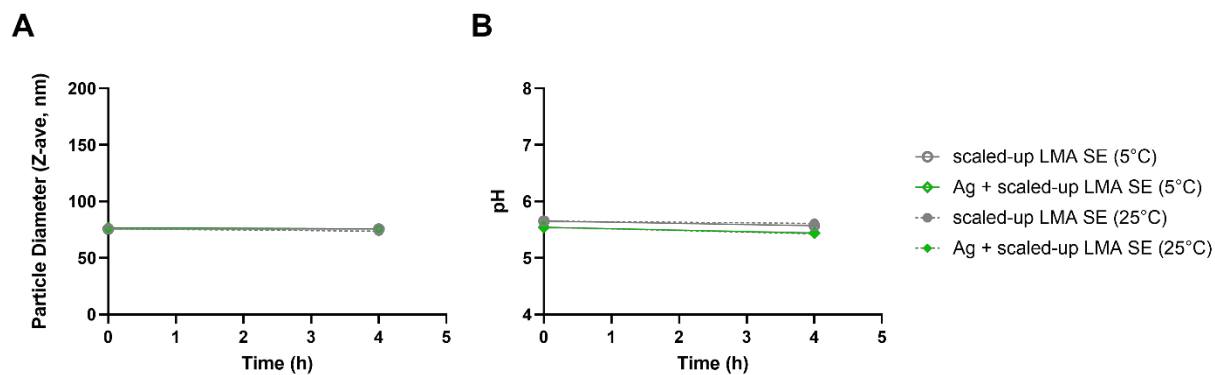

**Figure S11. Physicochemical stability of emulsion after mixing with H5N1 vaccine antigen and stored at 5°C or 25°C for 4 hours.** A) Formulation particle diameter measured by dynamic light scattering. B) Formulation pH. Ag = antigen, LMA = lauryl methacrylate, SE = stable emulsion.
